# Supplementary material for: Plant invasion and naturalization are influenced by genome size, ecology and economic use globally
Source: PubMed Central journal article supplement (PMC10864296; doi:10.1038/s41467-024-45667-4), 2024-02-13
Supplement: 41467_2024_45667_MOESM1_ESM.pdf [file 41467_2024_45667_MOESM1_ESM.pdf]

# 1 **Supplementary Information**

## 2 **Plant invasion and naturalization are influenced by genome size,** 3 **ecology and economic use globally**

4 Kun Guo<sup>1,2</sup>, Petr Pyšek<sup>3,4</sup>, Mark van Kleunen<sup>5,6</sup>, Nicole L. Kinlock<sup>5</sup>, Magdalena Lučanová<sup>7,8</sup>,  
5 Ilia J. Leitch<sup>9</sup>, Simon Pierce<sup>10</sup>, Wayne Dawson<sup>11,12</sup>, Franz Essl<sup>13</sup>, Holger Kreft<sup>14, 15, 16</sup>, Bernd  
6 Lenzner<sup>13</sup>, Jan Pergl<sup>3</sup>, Patrick Weigelt<sup>14, 15, 16</sup>, Wen-Yong Guo<sup>1,2, 17\*</sup>

7 <sup>1</sup>Zhejiang Tiantong Forest Ecosystem National Observation and Research Station, School of Ecological  
8 and Environmental Sciences, East China Normal University, 200241 Shanghai, P. R. China, email:  
9 kguo@geo.ecnu.edu.cn; wyguo@des.ecnu.edu.cn

10 <sup>2</sup>Research Center for Global Change and Complex Ecosystems, School of Ecological and Environmental  
11 Sciences, East China Normal University, 200241 Shanghai, P. R. China

12 <sup>3</sup>Czech Academy of Sciences, Institute of Botany, Department of Invasion Ecology, Průhonice, CZ-  
13 25243, Czech Republic, email: pysek@ibot.cas.cz; email: pergl@ibot.cas.cz

14 <sup>4</sup>Department of Ecology, Faculty of Science, Charles University, Viničná 7, Prague, CZ-12844, Czech  
15 Republic

16 <sup>5</sup>Ecology, Department of Biology, University of Konstanz, Universitätsstrasse 10, D-78457 Konstanz,  
17 Germany, email: mark.vankleunen@uni-konstanz.de; nicole.kinlock@uni-konstanz.de

18 <sup>6</sup>Zhejiang Provincial Key Laboratory of Plant Evolutionary Ecology and Conservation, Taizhou  
19 University, Taizhou 318000, P. R. China

20 <sup>7</sup>Czech Academy of Sciences, Institute of Botany, Department of Evolutionary Plant Biology, Průhonice,  
21 CZ-25243 Czech Republic, email: kubesovm@gmail.com

22 <sup>8</sup>Department of Botany, Faculty of Science, University of South Bohemia, Branišovská 1760, České  
23 Budějovice, CZ-370 05, Czech Republic

24 <sup>9</sup>Royal Botanic Gardens, Kew, Richmond, Surrey TW9 3AB, United Kingdom, email: i.leitch@kew.org

25 <sup>10</sup>Department of Agricultural and Environmental Sciences (DiSAA), University of Milan, Via G. Celoria  
26 2, I-20133 Milan, Italy, email: simon.pierce@unimi.it

27 <sup>11</sup>Department of Biosciences, Durham University, Durham, United Kingdom

28 <sup>12</sup>Department of Evolution, Ecology and Behaviour, Institute of Infection, Veterinary and Ecological  
29 Sciences, University of Liverpool, Liverpool, UK, email: wayne.dawson@liverpool.ac.uk

30 <sup>13</sup>Division of BioInvasions, Global Change & Macroecology, Department of Botany and Biodiversity  
31 Research, University of Vienna, Vienna, Austria, email: franz.essl@univie.ac.at;  
32 bernd.lenzner@univie.ac.at

33 <sup>14</sup>Biodiversity, Macroecology & Biogeography, University of Goettingen, Göttingen, Germany, email:  
34 hkreft@uni-goettingen.de, pweigel@uni-goettingen.de

35 <sup>15</sup>Centre of Biodiversity and Sustainable Land Use (CBL), University of Goettingen, Göttingen,  
36 Germany

37 <sup>16</sup>Campus-Institute Data Science, Göttingen, Germany

38 <sup>17</sup>Shanghai Key Lab for Urban Ecological Processes and Eco-Restoration, School of Ecological and  
39 Environmental Sciences, East China Normal University, 200241 Shanghai, P. R. China

40 \* Corresponding author: Wen-Yong Guo, wyguo@des.ecnu.edu.cn

41

42

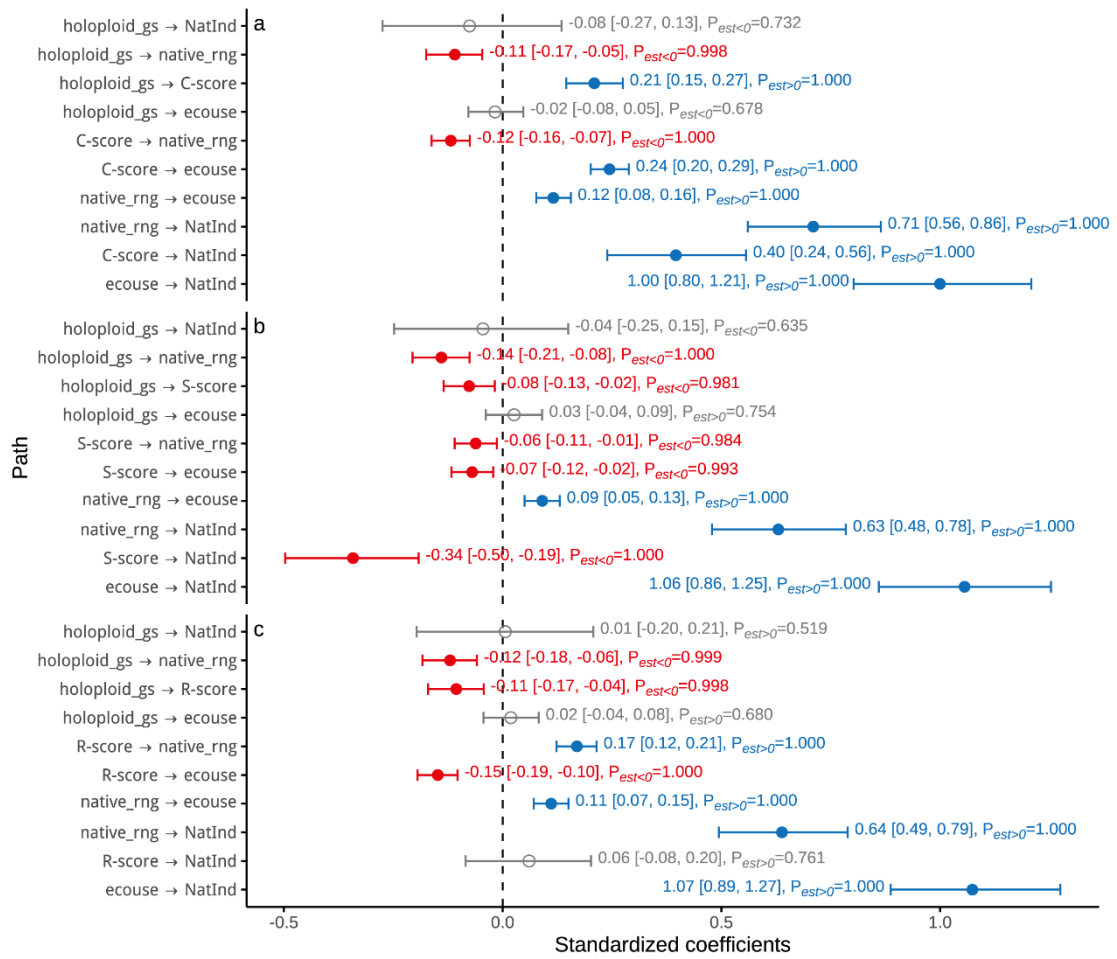

43

44

45 **Supplementary Fig. 1 | Point plots showing the standardized coefficients ( $\pm$  95% credible intervals)**

46 **of each path in SEMs linking holoploid genome size to naturalization incidence (NatInd; whether**

47 **the species is listed as naturalized in the GloNAF database;  $n = 1612$ ). The filled red points, filled blue**

48 **points and non-filled points, respectively, stand for positive, negative and non-significant coefficients.**

49 Abbreviations used in the plot: holoploid\_gs, holoploid genome size; native\_rng, native range size;

50 ecouse, economic use.

51

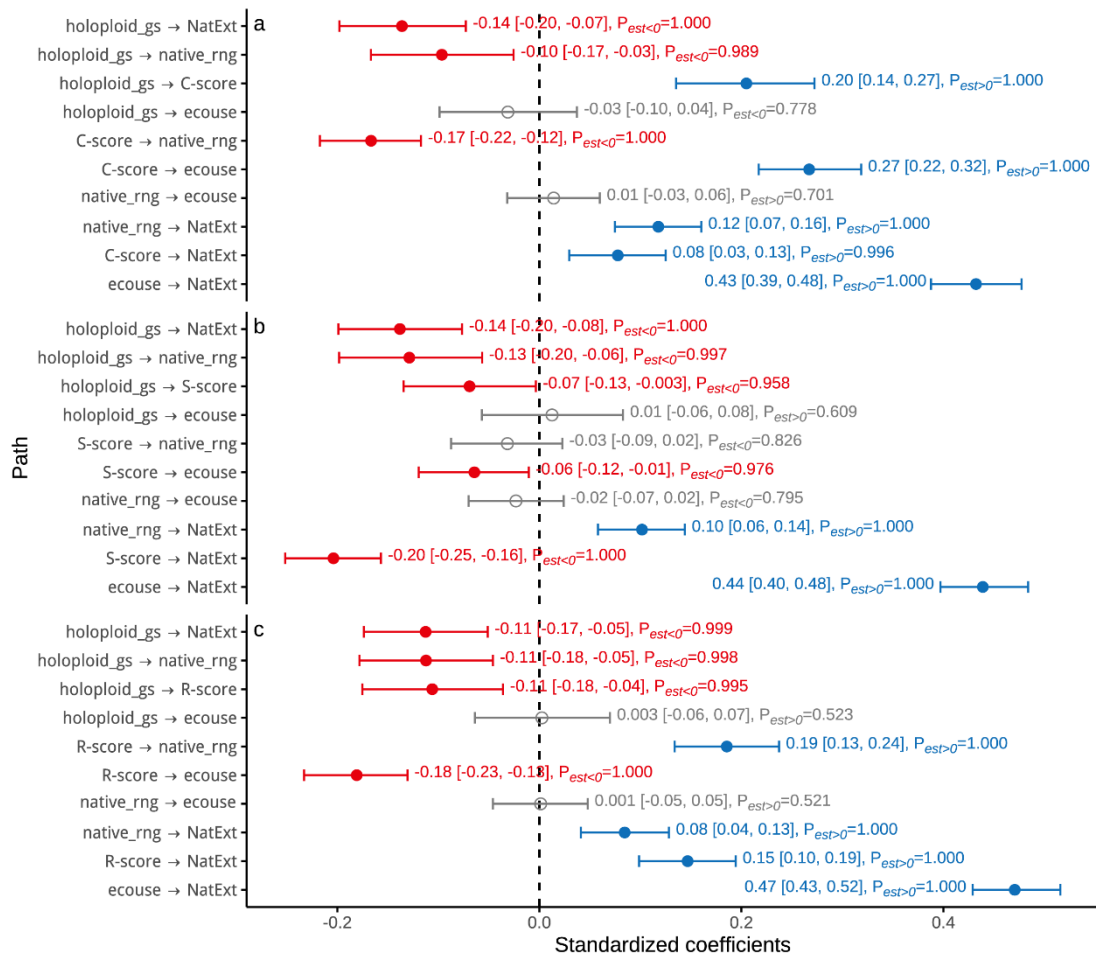

52

53 **Supplementary Fig. 2 | Point plots showing the standardized coefficients ( $\pm$  95% credible intervals)**

54 **of each path in SEMs linking holoploid genome size to naturalization extent (NatExt; the number of**

55 **regions a species has been recorded in as naturalized; n = 1193). The filled red points, filled blue points**

56 **and non-filled points, respectively, stand for positive, negative and non-significant coefficients.**

57 **Abbreviations used in the plot: holoploid\_gs, holoploid genome size; native\_rng, native range size;**

58 **ecouse, economic use.**

59

60

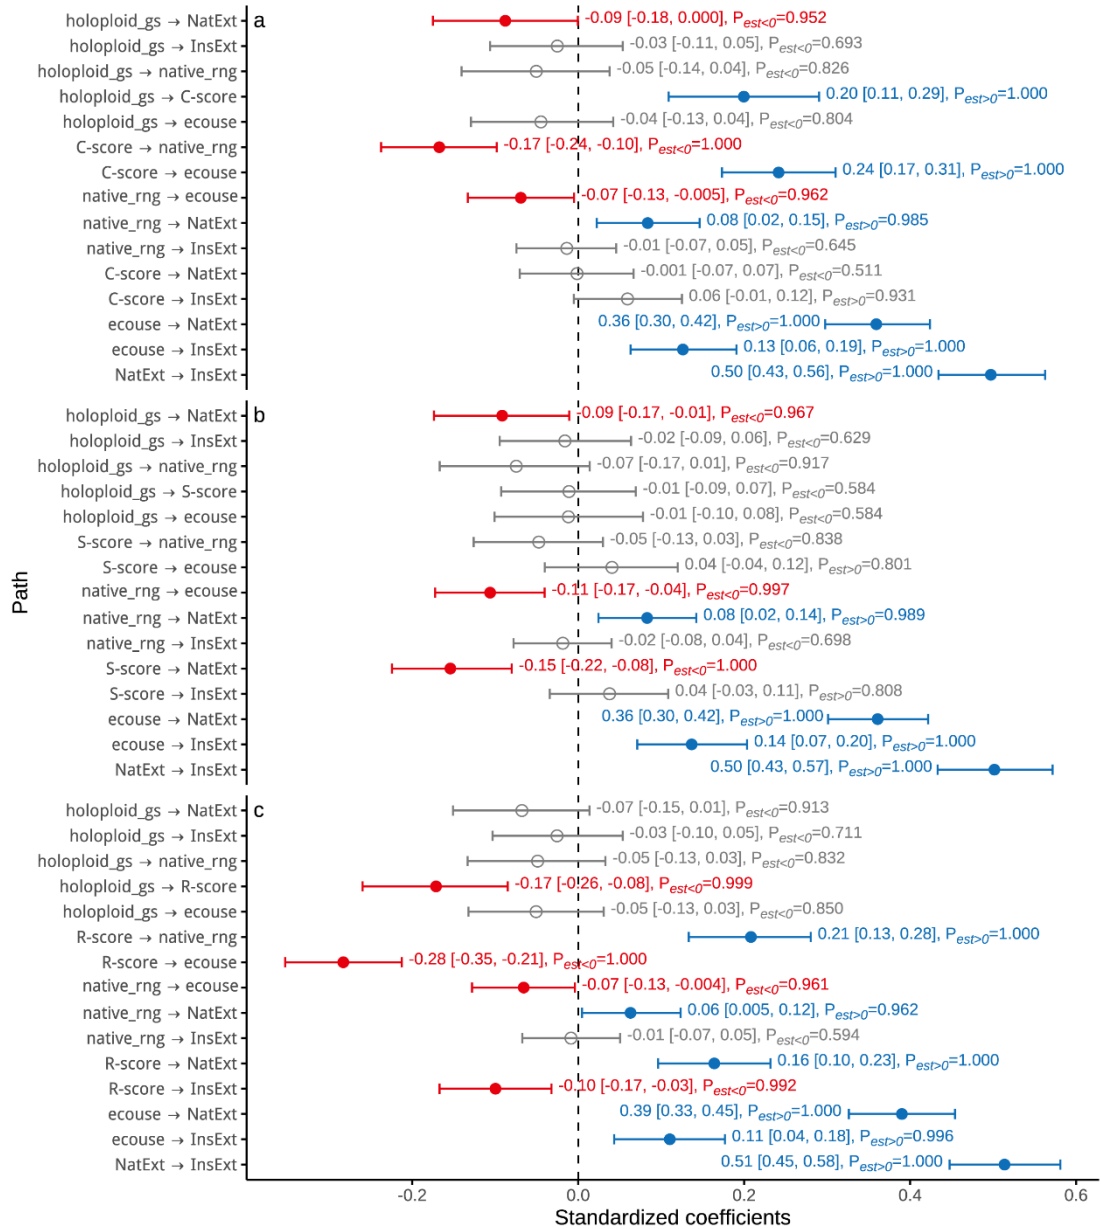

61

62 **Supplementary Fig. 3 | Point plots showing the standardized coefficients ( $\pm$  95% credible intervals)**

63 **of each path in SEMs linking holoploid genome size to invasion extent (InvExt; the number of regions**

64 **a species has been recorded in as invasive; n = 618). The filled red points, filled blue points and non-**

65 **filled points, respectively, stand for positive, negative and non-significant coefficients. Abbreviations**

66 **used in the plot: holoploid\_gs, holoploid genome size; native\_rng, native range size; ecouse, economic**

67 **use; NatExt, naturalization extent.**

68

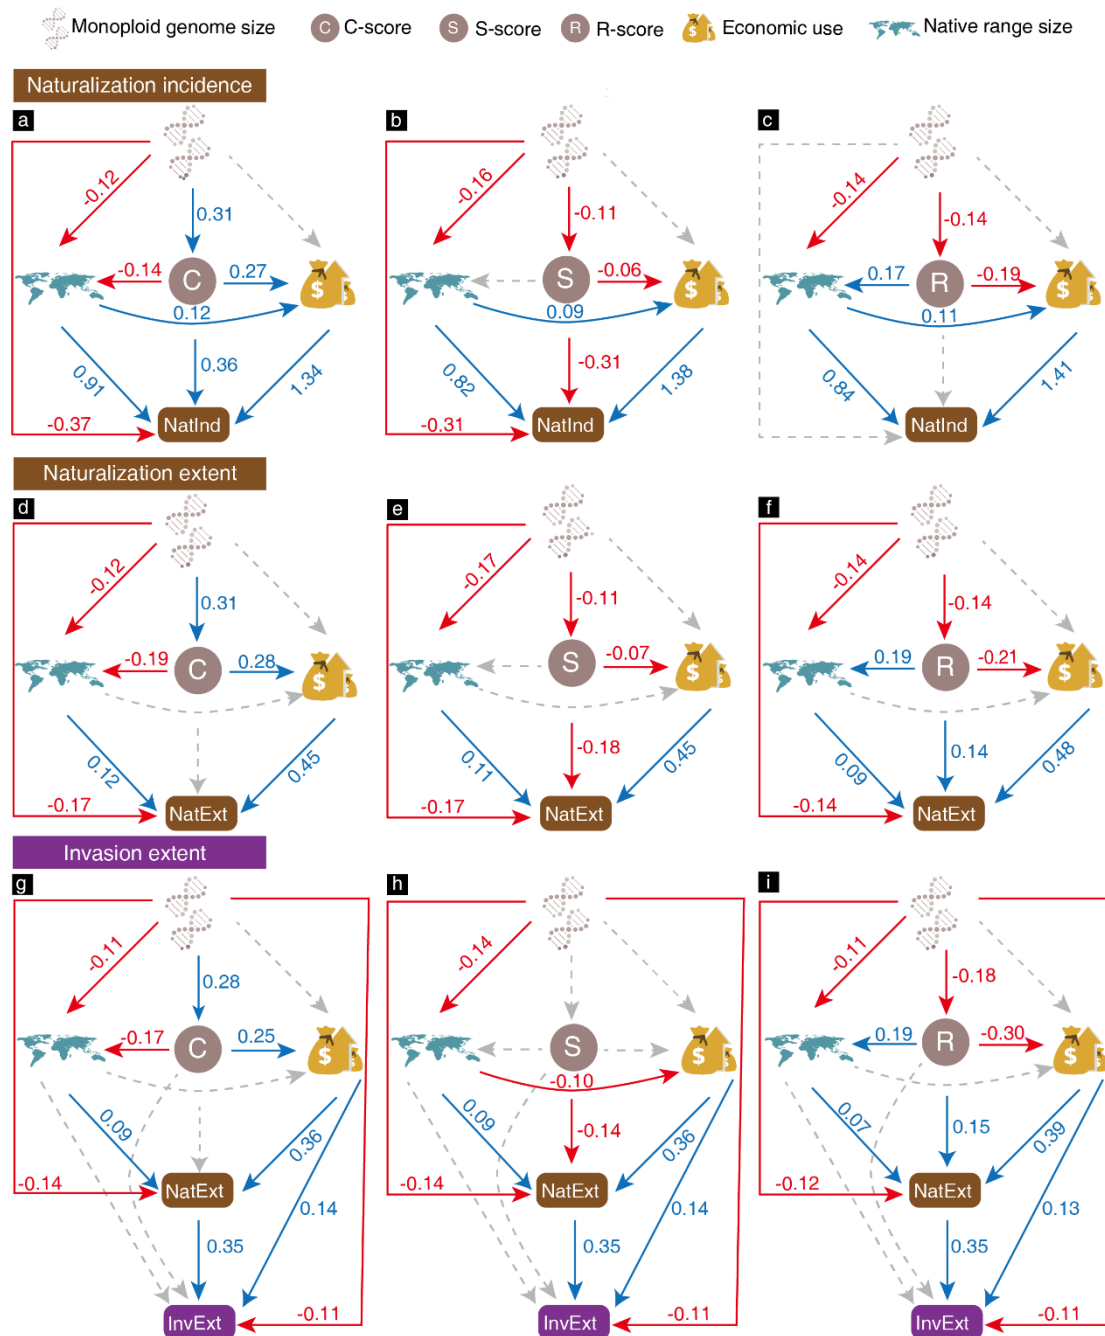

69

70

**Supplementary Fig. 4 | Structural equation models linking plant monoploid genome size, CSR-**

71

**strategy scores, native range size, and economic use to (a-c) naturalization incidence (NatInd,**

72

**whether the species is listed as naturalized in the GloNAF database; n = 993), (d-f) naturalization extent**

73

**(NatExt, the number of regions a species has been recorded in as naturalized; n = 792), and (g-i) invasion**

74

**extent (InvExt, the number of regions a species has been recorded in as invasive; n = 450). The solid red**

75

**line, solid blue line and dashed grey line, respectively, indicate negative, positive and nonsignificant (95%**

76

**credible interval excludes or includes zero) relationships. Numbers beside the arrows are standardized**

77

**coefficients, which are only shown for significant paths. See Fig. S5-7 for details of each path.**

78

79

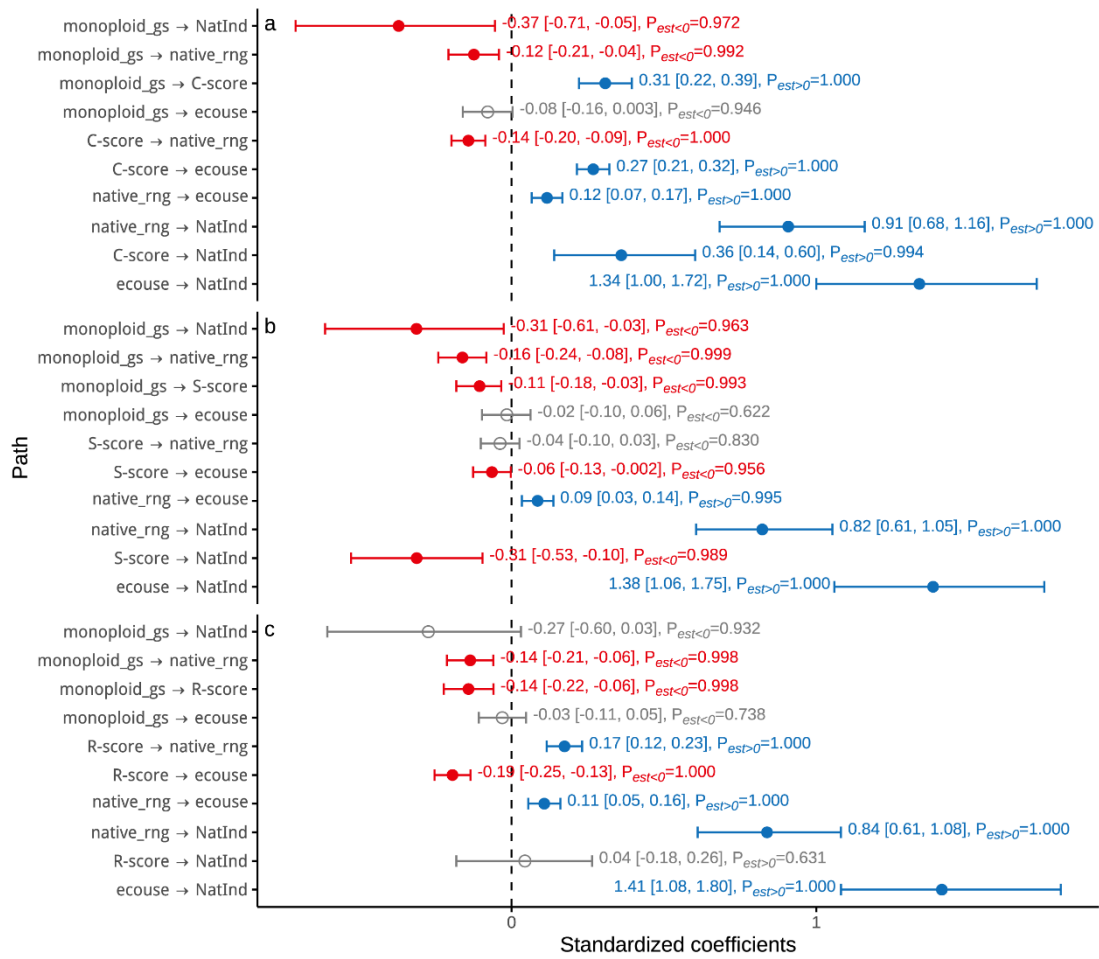

80

81 **Supplementary Fig. 5 | Point plots showing the standardized coefficients ( $\pm$  95% credible intervals)**

82 **of each path in SEMs linking monoploid genome size to naturalization incidence (NatInd; whether**

83 **the species is listed as naturalized in GloNAF database; n = 993). The filled red points, filled blue points**

84 **and non-filled points, respectively, stand for positive, negative and non-significant coefficients.**

85 **Abbreviations used in the plot: monoploid\_gs, monoploid genome size; native\_rng, native range size;**

86 **ecouse, economic use.**

87

88

89

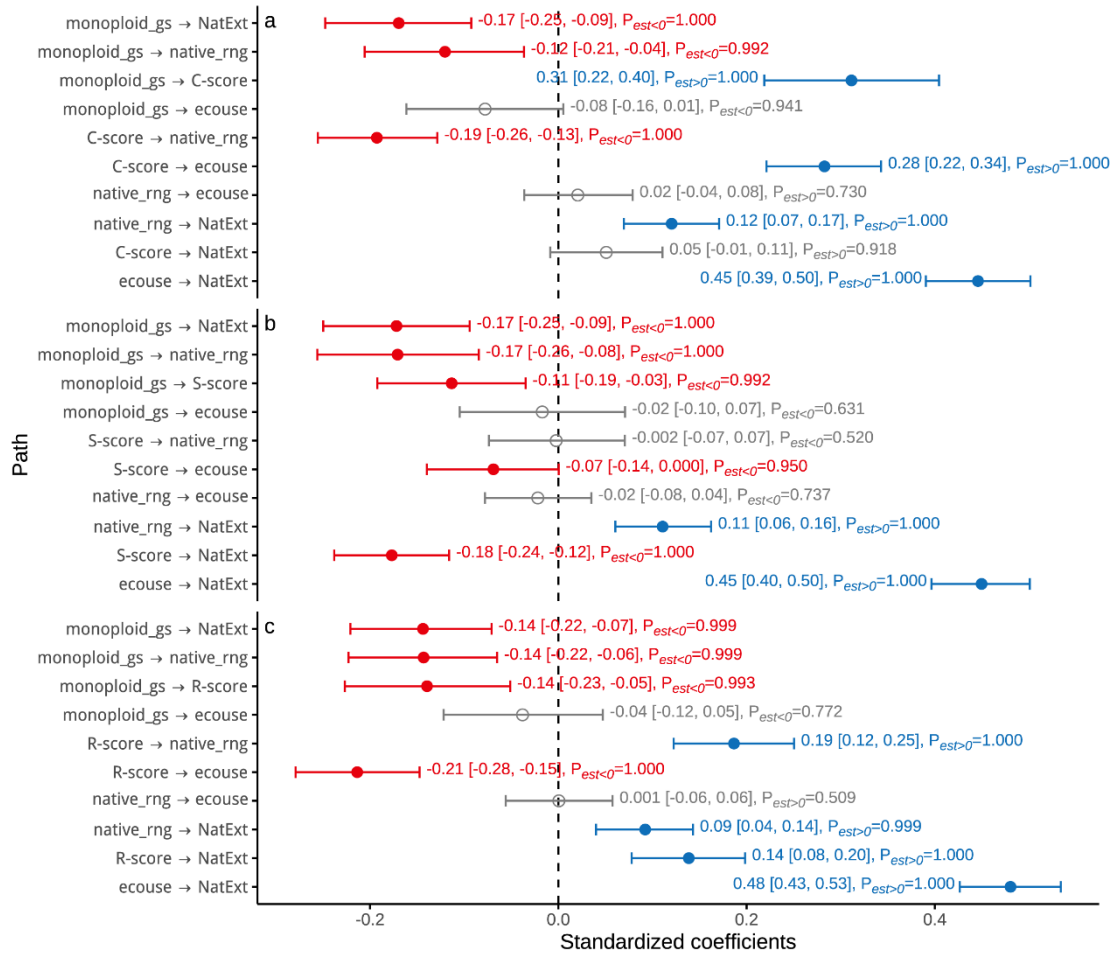

90

91 **Supplementary Fig. 6 | Point plots showing the standardized coefficients ( $\pm$  95% credible intervals)**

92 **of each path in SEMs linking monoploid genome size to naturalization extent (NatExt; the number**

93 **of regions a species has been recorded in as naturalized;  $n = 792$ ). The filled red points, filled blue points**

94 **and non-filled points, respectively, stand for positive, negative and non-significant coefficients.**

95 Abbreviations used in the plot: monoploid\_gs, monoploid genome size; native\_rng, native range size;

96 ecouse, economic use.

97



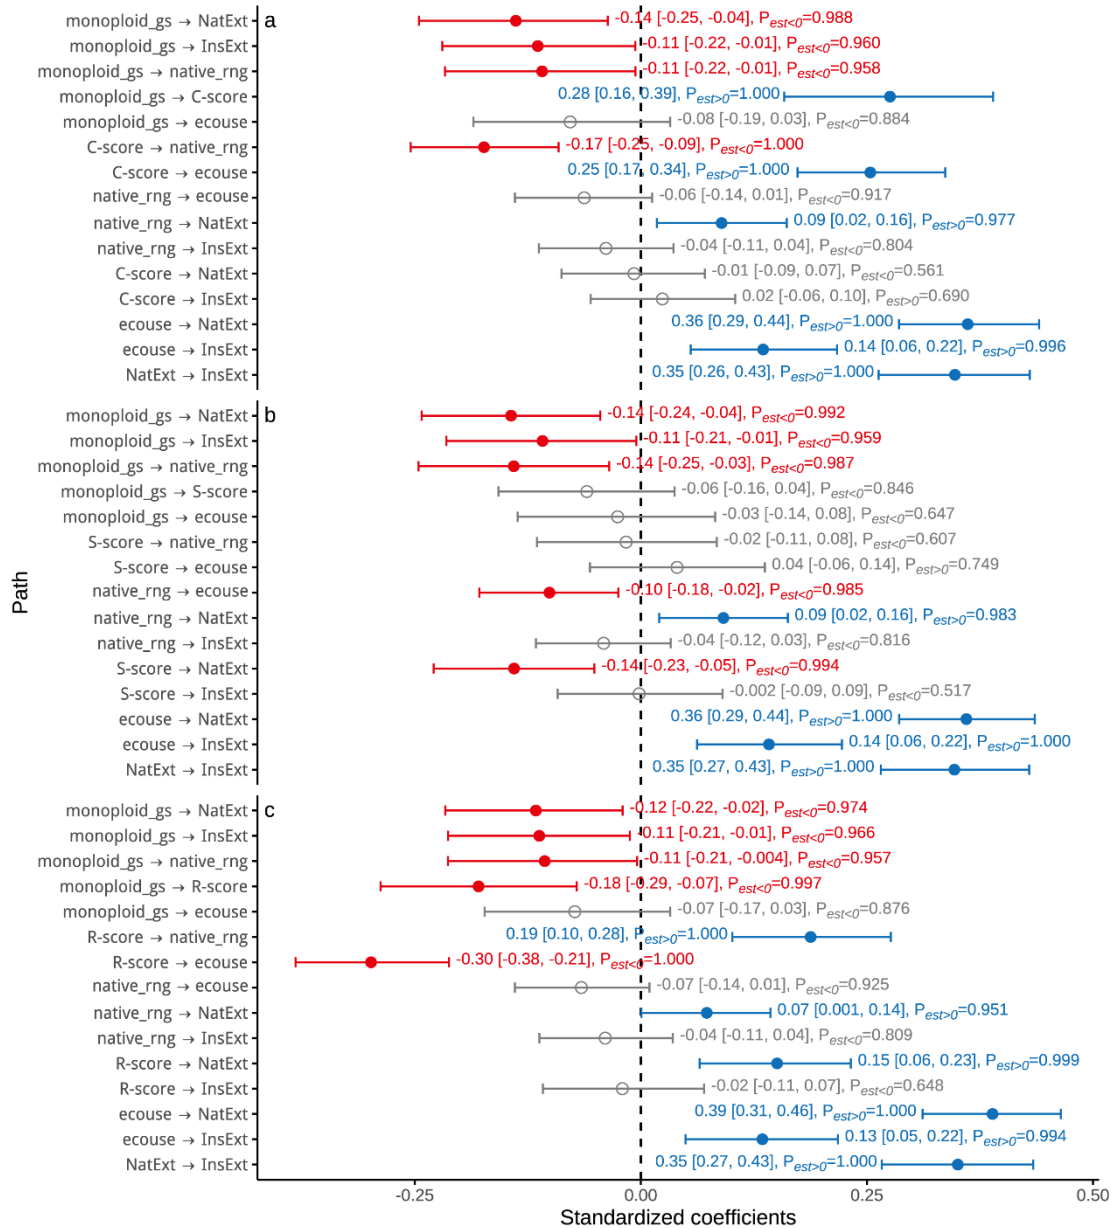

98

99 **Supplementary Fig. 7 | Point plots showing the standardized coefficients ( $\pm$  95% credible intervals)**

100 **of each path in SEMs linking monoploid genome size to invasion extent (InvExt; the number of**

101 **regions a species has been recorded in as naturalized;  $n = 450$ ). The filled red points, filled blue points**

102 **and non-filled points, respectively, stand for positive, negative and non-significant coefficients.**

103 **Abbreviations used in the plot: monoploid\_gs, monoploid genome size; native\_rng, native range size;**

104 **ecouse, economic use.**

105

106

107

108 **Supplementary Table 1 | Coefficients of direct and indirect paths from genome size to plant invasions (Fig. 3 and Supplementary Figure 4) identified from SEMs.** We  
 109 calculated the one-tailed probability that the estimated coefficients were  $> 0$  ( $P_{est} > 0$ , for positive estimates) or  $< 0$  ( $P_{est} < 0$ , for negative estimates). Non-significant coefficients  
 110 of direct paths are marked with "NS", whereas only significant indirect paths are shown.

| Figs    | From                  | Via                                          | To                       | Coefficients |    |
|---------|-----------------------|----------------------------------------------|--------------------------|--------------|----|
| Fig. 3a | Holoploid genome size |                                              | Naturalization incidence | -0.080       | NS |
|         | Holoploid genome size | Native range size                            | Naturalization incidence | -0.078       |    |
|         | Holoploid genome size | C-scores                                     | Naturalization incidence | 0.084        |    |
|         | Holoploid genome size | C-scores → Native range size                 | Naturalization incidence | -0.018       |    |
|         | Holoploid genome size | C-scores → Native range size → Economic uses | Naturalization incidence | -0.003       |    |
|         | Holoploid genome size | C-scores → Economic uses                     | Naturalization incidence | 0.050        |    |
|         | Holoploid genome size | Native range size → Economic uses            | Naturalization incidence | -0.013       |    |
| Fig. 3b | Holoploid genome size |                                              | Naturalization incidence | -0.040       | NS |
|         | Holoploid genome size | Native range size                            | Naturalization incidence | -0.088       |    |
|         | Holoploid genome size | S-scores                                     | Naturalization incidence | 0.027        |    |
|         | Holoploid genome size | S-scores → Native range size                 | Naturalization incidence | 0.003        |    |
|         | Holoploid genome size | S-scores → Native range size → Economic uses | Naturalization incidence | -0.0005      |    |
|         | Holoploid genome size | S-scores → Economic uses                     | Naturalization incidence | 0.006        |    |
|         | Holoploid genome size | Native range size → Economic uses            | Naturalization incidence | -0.013       |    |
| Fig. 3c | Holoploid genome size |                                              | Naturalization incidence | 0.010        | NS |
|         | Holoploid genome size | Native range size                            | Naturalization incidence | -0.077       |    |
|         | Holoploid genome size | R-scores                                     | Naturalization incidence | -0.009       |    |
|         | Holoploid genome size | R-scores → Native range size                 | Naturalization incidence | -0.012       |    |
|         | Holoploid genome size | R-scores → Native range size → Economic uses | Naturalization incidence | -0.002       |    |

|         |                       |                                                  |                          |         |    |
|---------|-----------------------|--------------------------------------------------|--------------------------|---------|----|
|         | Holoploid genome size | R-scores → Economic uses                         | Naturalization incidence | 0.018   |    |
|         | Holoploid genome size | Native range size → Economic uses                | Naturalization incidence | -0.014  |    |
| Fig. 3d | Holoploid genome size |                                                  | Naturalization extent    | -0.140  |    |
|         | Holoploid genome size | Native range size                                | Naturalization extent    | -0.012  |    |
|         | Holoploid genome size | C-scores                                         | Naturalization extent    | 0.016   |    |
|         | Holoploid genome size | C-scores → Native range size                     | Naturalization extent    | -0.004  |    |
|         | Holoploid genome size | C-scores → Native range size → Economic uses     | Naturalization extent    | -0.0001 |    |
|         | Holoploid genome size | C-scores → Economic uses                         | Naturalization extent    | 0.023   |    |
|         | Holoploid genome size | Native range size → Economic uses                | Naturalization extent    | -0.001  |    |
| Fig.3e  | Holoploid genome size |                                                  | Naturalization extent    | -0.140  |    |
|         | Holoploid genome size | Native range size                                | Naturalization extent    | -0.013  |    |
|         | Holoploid genome size | S-scores                                         | Naturalization extent    | 0.014   |    |
|         | Holoploid genome size | S-scores → Economic uses                         | Naturalization extent    | 0.002   |    |
| Fig. 3f | Holoploid genome size |                                                  | Naturalization extent    | -0.110  |    |
|         | Holoploid genome size | Native range size                                | Naturalization extent    | -0.009  |    |
|         | Holoploid genome size | R-scores                                         | Naturalization extent    | -0.017  |    |
|         | Holoploid genome size | R-scores → Native range size                     | Naturalization extent    | -0.002  |    |
|         | Holoploid genome size | R-scores → Economic uses                         | Naturalization extent    | -0.009  |    |
| Fig.3g  | Holoploid genome size |                                                  | Invasion extent          | -0.090  | NS |
|         | Holoploid genome size | C-scores → Economic uses                         | Invasion extent          | 0.006   |    |
|         | Holoploid genome size | C-scores → Economic uses → Naturalization extent | Invasion extent          | 0.009   |    |
| Fig.3h  | Holoploid genome size |                                                  | Invasion extent          | -0.020  | NS |
|         | Holoploid genome size | Naturalization extent                            | Invasion extent          | -0.045  |    |
| Fig.3i  | Holoploid genome size |                                                  | Invasion extent          | -0.030  | NS |

|         |                       |                                                                      |                          |        |    |
|---------|-----------------------|----------------------------------------------------------------------|--------------------------|--------|----|
|         | Holoploid genome size | R-scores                                                             | Invasion extent          | 0.017  |    |
|         | Holoploid genome size | R-scores → Naturalization extent                                     | Invasion extent          | 0.020  |    |
|         | Holoploid genome size | R-scores → Native range size → Naturalization extent                 | Invasion extent          | 0.000  |    |
|         | Holoploid genome size | R-scores → Native range size → Economic uses                         | Invasion extent          | 0.000  |    |
|         | Holoploid genome size | R-scores → Native range size → Economic uses → Naturalization extent | Invasion extent          | 0.000  |    |
|         | Holoploid genome size | R-scores → Economic uses                                             | Invasion extent          | 0.005  |    |
|         | Holoploid genome size | R-scores → Economic uses → Naturalization extent                     | Invasion extent          | 0.009  |    |
| Fig.S4a | Monoploid genome size |                                                                      | Naturalization incidence | -0.370 |    |
|         | Monoploid genome size | Native range size                                                    | Naturalization incidence | -0.109 |    |
|         | Monoploid genome size | C-scores                                                             | Naturalization incidence | 0.112  |    |
|         | Monoploid genome size | C-scores → Native range size                                         | Naturalization incidence | -0.039 |    |
|         | Monoploid genome size | C-scores → Native range size → Economic uses                         | Naturalization incidence | -0.007 |    |
|         | Monoploid genome size | C-scores → Economic uses                                             | Naturalization incidence | 0.112  |    |
|         | Monoploid genome size | Native range size → Economic uses                                    | Naturalization incidence | -0.019 |    |
| Fig.S4b | Monoploid genome size |                                                                      | Naturalization incidence | -0.310 |    |
|         | Monoploid genome size | Native range size                                                    | Naturalization incidence | -0.131 |    |
|         | Monoploid genome size | S-scores                                                             | Naturalization incidence | 0.034  |    |
|         | Monoploid genome size | S-scores → Economic uses                                             | Naturalization incidence | 0.009  |    |
|         | Monoploid genome size | Native range size → Economic uses                                    | Naturalization incidence | -0.020 |    |
| Fig.S4c | Monoploid genome size |                                                                      | Naturalization incidence | -0.270 | NS |
|         | Monoploid genome size | Native range size                                                    | Naturalization incidence | -0.118 |    |
|         | Monoploid genome size | R-scores → Native range size                                         | Naturalization incidence | -0.013 |    |
|         | Monoploid genome size | R-scores → Native range size → Economic uses                         | Naturalization incidence | -0.004 |    |
|         | Monoploid genome size | R-scores → Economic uses                                             | Naturalization incidence | 0.038  |    |

|         |                       |                                                           |                          |         |
|---------|-----------------------|-----------------------------------------------------------|--------------------------|---------|
|         | Monoploid genome size | Native range size → Economic uses                         | Naturalization incidence | -0.022  |
| Fig.S4d | Monoploid genome size |                                                           | Naturalization extent    | -0.170  |
|         | Monoploid genome size | Native range size                                         | Naturalization extent    | -0.014  |
|         | Monoploid genome size | C-scores → Economic uses                                  | Naturalization extent    | 0.038   |
| Fig.S4e | Monoploid genome size |                                                           | Naturalization extent    | -0.170  |
|         | Monoploid genome size | Native range size                                         | Naturalization extent    | -0.019  |
|         | Monoploid genome size | S-scores                                                  | Naturalization extent    | 0.020   |
|         | Monoploid genome size | S-scores → Economic uses                                  | Naturalization extent    | 0.003   |
| Fig.S4f | Monoploid genome size |                                                           | Naturalization extent    | -0.140  |
|         | Monoploid genome size | Native range size                                         | Naturalization extent    | -0.013  |
|         | Monoploid genome size | R-scores                                                  | Naturalization extent    | -0.020  |
|         | Monoploid genome size | R-scores → Native range size                              | Naturalization extent    | -0.002  |
| Fig.S4g | Monoploid genome size |                                                           | Invasion extent          | -0.110  |
|         | Monoploid genome size | Naturalization extent                                     | Invasion extent          | -0.049  |
|         | Monoploid genome size | Native range size                                         | Invasion extent          | 0.004   |
|         | Monoploid genome size | Native range size → Naturalization extent                 | Invasion extent          | -0.0004 |
|         | Monoploid genome size | C-scores → Native range size → Naturalization extent      | Invasion extent          | -0.001  |
|         | Monoploid genome size | C-scores → Economic uses                                  | Invasion extent          | 0.010   |
|         | Monoploid genome size | C-scores → Economic uses → Naturalization extent          | Invasion extent          | 0.009   |
| Fig.S4h | Monoploid genome size |                                                           | Invasion extent          | -0.110  |
|         | Monoploid genome size | Naturalization extent                                     | Invasion extent          | -0.049  |
|         | Monoploid genome size | S-scores → Economic uses → Naturalization extent          | Invasion extent          | 0.002   |
|         | Monoploid genome size | Native range size → Economic uses                         | Invasion extent          | 0.002   |
|         | Monoploid genome size | Native range size → Economic uses → Naturalization extent | Invasion extent          | 0.002   |

|        |                       |                                                      |                 |        |
|--------|-----------------------|------------------------------------------------------|-----------------|--------|
| Fig.4i | Monoploid genome size |                                                      | Invasion extent | -0.110 |
|        | Monoploid genome size | Naturalization extent                                | Invasion extent | -0.064 |
|        | Monoploid genome size | Native range size → Naturalization extent            | Invasion extent | -0.003 |
|        | Monoploid genome size | R-scores → Naturalization extent                     | Invasion extent | -0.009 |
|        | Monoploid genome size | R-scores → Native range size → Naturalization extent | Invasion extent | -0.001 |
|        | Monoploid genome size | R-scores → Economic uses                             | Invasion extent | -0.006 |
|        | Monoploid genome size | R-scores → Economic uses → Naturalization extent     | Invasion extent | 0.007  |

111

112

113

114

115

116

117 **Supplementary Table 2 | Description of the 10 main categories of economic use (derived from**  
 118 **Diazgranados *et al.* 2020) employed in this study.** Since the economic use categories ‘gene sources’  
 119 and ‘poisons’ do not necessarily require cultivation of the species, and because these categories were  
 120 shown to contribute little to plant naturalization success (see Fig.2 in van Kleunen et al. 2020 for details),  
 121 we excluded these two categories from the assessment of species economic use.

| <b>Economic use category</b> | <b>Abbreviation</b> | <b>Description</b>                                                                                                                                                                                                                                             |
|------------------------------|---------------------|----------------------------------------------------------------------------------------------------------------------------------------------------------------------------------------------------------------------------------------------------------------|
| Animal food                  | AF                  | Forage and fodder for vertebrate animals only.                                                                                                                                                                                                                 |
| Environmental uses           | EU                  | Intercrops and nurse crops, ornamentals, barrier hedges, shade plants, windbreaks, soil improvers, plants for revegetation and erosion control, wastewater purifiers, indicators of the presence of metals, pollution, or underground water.                   |
| Fuels                        | FU                  | Wood, charcoal, petroleum substitutes, fuel alcohols, etc. - have been separated from the ‘MATERIALS’ category below because of their importance.                                                                                                              |
| Gene sources                 | GS                  | Wild relatives of major crops which may possess traits associated with biotic or abiotic resistance and may be valuable for breeding programs.                                                                                                                 |
| Human food                   | HF                  | Food, including beverages, for humans.                                                                                                                                                                                                                         |
| Invertebrate food            | IF                  | Only plants eaten by invertebrates useful to humans, such as silkworms, lac insects, and edible grubs, are covered here.                                                                                                                                       |
| Materials                    | MA                  | Woods, fibers, cork, cane, tannins, latex, resins, gums, waxes, oils, lipids, etc., and their derived products.                                                                                                                                                |
| Medicines                    | ME                  | Both human and veterinary.                                                                                                                                                                                                                                     |
| Poisons                      | PO                  | Plants which are poisonous to vertebrates and invertebrates, both accidentally and usefully, e.g., for hunting and fishing.                                                                                                                                    |
| Social uses                  | SU                  | Plants used for social purposes, which are not definable as food or medicines, for instance, masticatories, smoking materials, narcotics, hallucinogens, psychoactive drugs, contraceptives, abortifacients, and plants with ritual or religious significance. |

122

123

124 **References:**

- 125 Diazgranados, M., Allkin, B., Black, N., Cámara-Leret, R., Canteiro, C., Carretero, J., *et al.*  
126 (2020). World Checklist of Useful Plant Species. *Knowl. Netw. Biocomplexity*.
- 127 van Kleunen, M., Xu, X., Yang, Q., Maurel, N., Zhang, Z., Dawson, W., *et al.* (2020). Economic  
128 use of plants is key to their naturalization success. *Nat. Commun.*, 11, 1–12.
- 129
